# Supplementary material for: A broadband 3D microtubular photodetector based on a single wall carbon nanotube–graphene heterojunction
Source: Royal Society of Chemistry journal article supplement (doi:10.1039/d2nr05819g), 2022-12-16
Supplement: d2nr05819g1.pdf [file d2nr05819g1.pdf]

# **A Broadband 3D Microtubular Photodetector Based on Single Wall Carbon Nanotubes-Graphene Heterojunction**

**Yang Zhang<sup>#, 1</sup>, Yuning Li<sup>#, 1</sup>, Qing You<sup>1</sup>, Jingye Sun<sup>1</sup>, Ke Li<sup>1</sup>, Hao Hong<sup>2</sup>,  
Lingbing Kong<sup>1</sup>, Mingqiang Zhu<sup>1</sup>, Tao Deng<sup>\*, 1, 2</sup>, and Zewen Liu<sup>2</sup>**

<sup>1</sup>School of Electronic and Information Engineering, Beijing Jiaotong University,  
Beijing, 100044, China

<sup>2</sup>Institute of Microelectronics, Tsinghua University, Beijing, 100084, China

<sup>#</sup> Yang Zhang and Yuning Li contributed equally to this work.

<sup>\*</sup> Corresponding author. Tel: +86 51687022. E-mail: [dengtao@bjtu.edu.cn](mailto:dengtao@bjtu.edu.cn)

## **1. The detailed fabrication process of the 3D microtubular photodetector based on single wall carbon nanotubes (SWCNTs) and graphene heterojunction**

The detailed fabrication process of the 3D microtubular photodetector based on SWCNTs/graphene heterojunction is shown below (Fig. S1):

- (a) The silicon (Si) wafer was cleaned by dipping it in sulfuric acid ( $\text{H}_2\text{SO}_4$ ) and hydrogen peroxide ( $\text{H}_2\text{O}_2$ ) solution (volume ratio 4:1) at 85 °C for 20 minutes, followed by rinsing it with deionized water and drying it with nitrogen ( $\text{N}_2$ ) gas. Then a layer of aluminum (Al) with the thickness of 50 nm was sputtered onto the top of Si wafer.
- (b) The strained  $\text{SiN}_x$  layers were deposited on the Al sacrificial layer by a STS mixed frequency nitride plasma-enhanced chemical vapor deposition (PECVD) system, which consisted of a compressive strained  $\text{SiN}_x$  layer at the bottom and a tensile strained  $\text{SiN}_x$  layer on the top, with thicknesses of 80 nm and 50 nm, respectively. The compressive strained  $\text{SiN}_x$  layer was deposited at the conditions of 60 W, 380 kHz, 550 mTorr, 240 °C, 40.0 sccm of  $\text{SiH}_4$  and 20 sccm of  $\text{NH}_3$  ( $\text{SiH}_4/\text{NH}_3$  ratio of 2). While the tensile  $\text{SiN}_x$  layer was deposited at the conditions of 30 W, 13.56 MHz, 900 mTorr, 240 °C, 40.0 sccm of  $\text{SiH}_4$  and 55.0 sccm of  $\text{NH}_3$  ( $\text{SiH}_4/\text{NH}_3$  ratio of 0.72).  $\text{N}_2$  flow was kept constant at 1960 sccm. After the deposition process, reactive ion etching (RIE) process was carried out to pattern the  $\text{SiN}_x$  layer.
- (c) A gate electrode consisting of chromium (Cr) and gold (Au) with the thicknesses of 10 nm and 50 nm, respectively, was deposited on the  $\text{SiN}_x$  layer, using magnetron sputtering and lift-off processes.

- (d) A 30-nm-thick silicon dioxide ( $\text{SiO}_2$ ) layer was deposited on the Cr/Au gate electrode to achieve buried gate structure, using PECVD process. Then, RIE etching process was performed to pattern the  $\text{SiO}_2$  dielectric layer.
- (e) A CVD-grown single-layer graphene (Trivial Transfer Graphene<sup>TM</sup>, XFNANO Co. Ltd.) was transferred onto the top of the  $\text{SiO}_2$  layer. Then, oxygen ( $\text{O}_2$ ) plasma etching process was conducted to pattern the graphene layer.
- (f) Source and drain electrodes consisting of 10-nm-thick Cr and 50-nm-thick Au were deposited and patterned on the top of the  $\text{SiO}_2$  layer, using electron beam evaporation and lift-off processes. After this step, the planar (2D) graphene field-effect transistor (GFET) with buried gate structure was obtained.
- (g) The SWCNTs ((6, 5) chirality enriched ( $\geq 95\%$ ) semiconducting SWCNTs, Sigma-Aldrich) were dispersed in N-Methyl pyrrolidone (Aladdin) with a concentration of 0.1 mg/ml, followed by ultrasonication under the power of 800 W for 1 h. Then the resultant suspensions were centrifuged with 10,000 g for 1 h and the supernatant were collected. After that, drop the SWCNTs suspensions onto the surface of 2D GFET.
- (h) After being drying out in an oven under 90 °C for 30 minutes, the 2D graphene/SWCNTs heterojunction photodetector was obtained.
- (i) Etch the Al sacrificial layer selectively using HCl :  $\text{H}_2\text{O}$  (volume ratio is 2 : 1) solution and the highly strained  $\text{SiN}_x$  layer rolled the 2D graphene/SWCNTs heterojunction photodetector into a 3D microtubular photodetector.
- (j) After being rinsed in deionized water and dried naturally, the 3D

graphene/SWCNTs heterojunction photodetector was obtained.

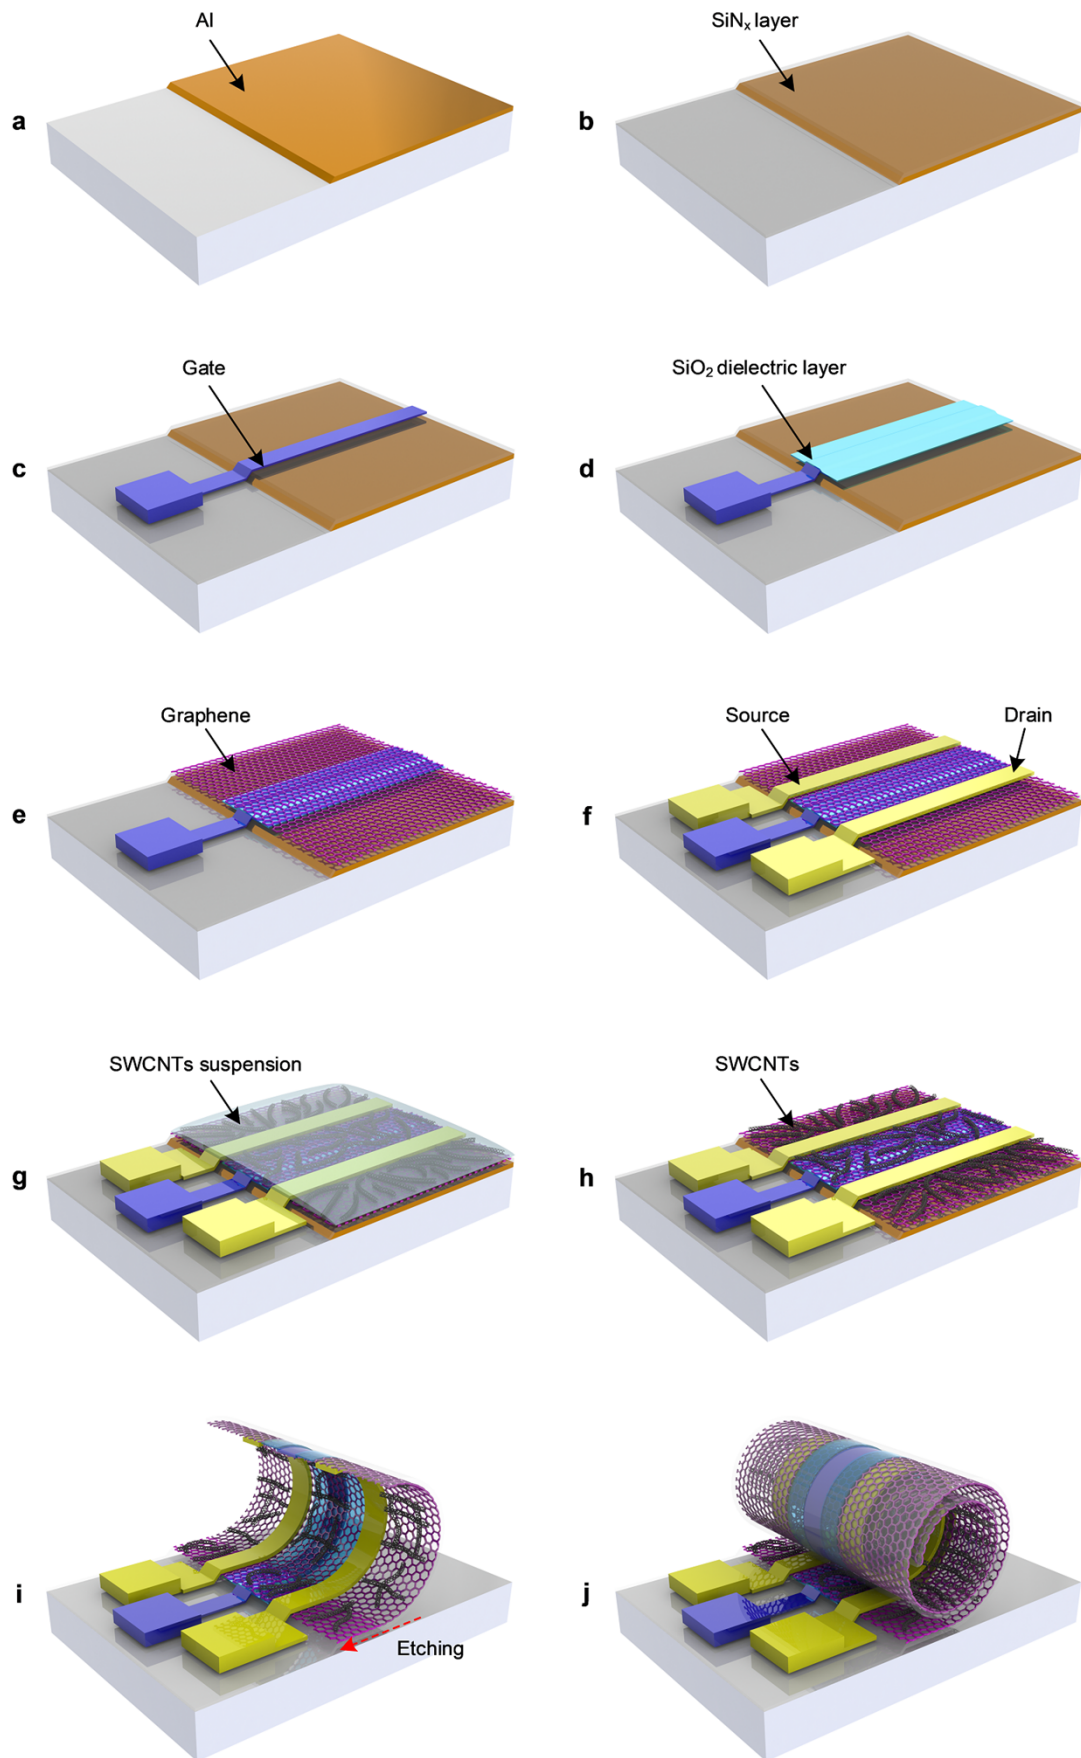

**Figure S1. The fabrication process of the 3D microtubular photodetector based on SWCNTs/graphene heterojunction.** (a) Clean Si wafer and sputter the Al layer. (b) Deposit SiN<sub>x</sub> passivation layer. (c) Sputter Cr/Au buried gate electrode. (d) Deposit SiO<sub>2</sub> dielectric layer. (e) Evaporate Cr/Au source and drain electrodes. (f) Transfer and pattern single-layer graphene. (g) Drop SWCNTs suspension onto 2D GFET. (h) Dry out the 2D GFET with SWCNTs. (i) Etch the Al sacrificial layer selectively. (j) Rinse and dry the 3D SWCNTs/graphene heterojunction photodetector.

## 2. The resistance profiles of the 2D and 3D heterojunction photodetectors

Figure S2 shows the resistive behavior of the SWCNTs/graphene heterojunction photodetector before (2D FET) and after (3D FET) self-rolled-up process. The carrier mobility ( $\mu$ ) and contact resistance ( $R_{\text{contact}}$ ) of the 2D and 3D FET are analyzed applying a model proposed by Kim *et al.* [1], as shown in below.

$$R_{\text{total}} = R_{\text{contact}} + R_{\text{channel}} = R_{\text{contact}} + \frac{1}{\mu e \sqrt{n_0^2 + n^2}} \frac{L}{W}, \quad (1)$$

where  $R_{\text{channel}}$  is the resistance of the graphene channel,  $L$  and  $W$  are the length and width of the graphene channel, respectively,  $e$  is the electronic charge,  $n_0$  is the density of carriers at the maximum resistance (Dirac point), and  $n$  is the gate voltage modulated carrier concentration. By fitting this model to the measured data in Fig. S2, the contact resistance  $R_{\text{contact}}$  and carrier mobility  $\mu$  can be extracted. For the 2D heterojunction photodetector (2D FET, Fig. S2a), the  $R_{\text{contact},2\text{D}} = 307 \ \Omega$  and  $\mu_{2\text{D}} = 1160 \ \text{cm}^2 \ \text{V}^{-1} \ \text{s}^{-1}$ . After rolled into the 3D microtubular photodetector (3D FET, Fig. S2b), the  $R_{\text{contact},3\text{D}}$  increases to  $332 \ \Omega$  and  $\mu_{3\text{D}}$  decreased to  $1129 \ \text{cm}^2 \ \text{V}^{-1} \ \text{s}^{-1}$  slightly.

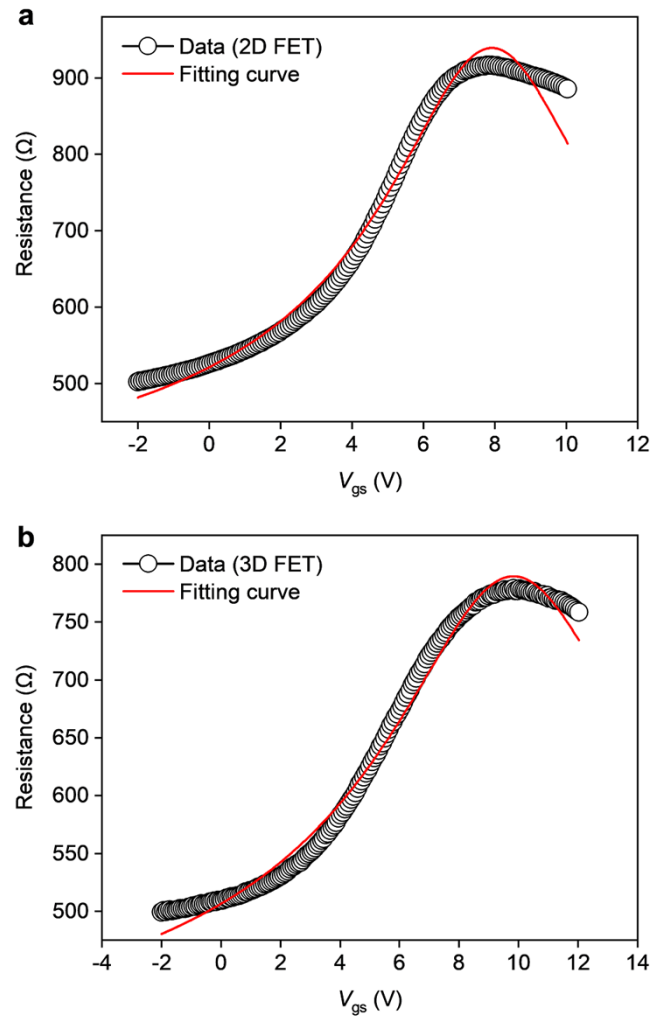

**Figure S2. The resistances of the 2D and 3D heterojunction photodetectors.** The resistance and fitting results as a function of the gate voltage ( $V_{gs}$ ) for the heterojunction photodetectors (a) before and (b) after self-rolled-up process.

### 3. The scanning electron microscopy (SEM) of the 3D heterojunction photodetector

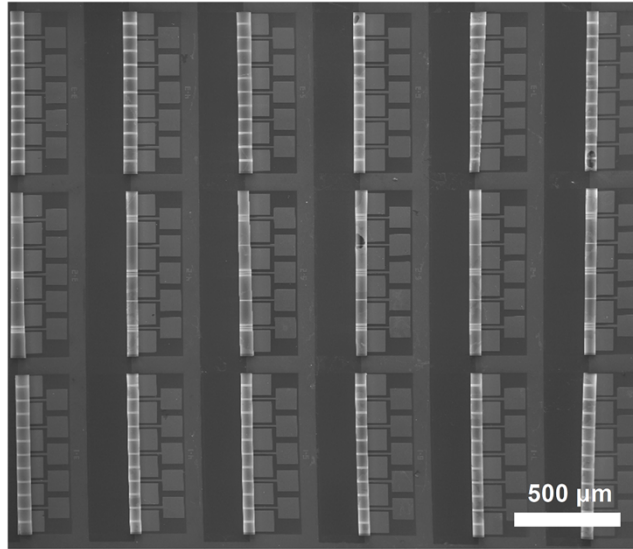

**Figure S3. The SEM of  $3 \times 6$  array of 3D microtubular photodetectors.**

**4. The resistance profile of the 3D heterojunction photodetector applied for photoresponse measurement.**

Figure S4 exhibits the resistive behavior of the 3D heterojunction photodetector used for photoresponse measurement. By fitting the curves, the contact resistance  $R_{\text{contact}}$  and carrier mobility  $\mu$  can be calculated as  $92 \Omega$  and  $1665 \text{ cm}^2 \text{ V}^{-1} \text{ s}^{-1}$ , respectively.

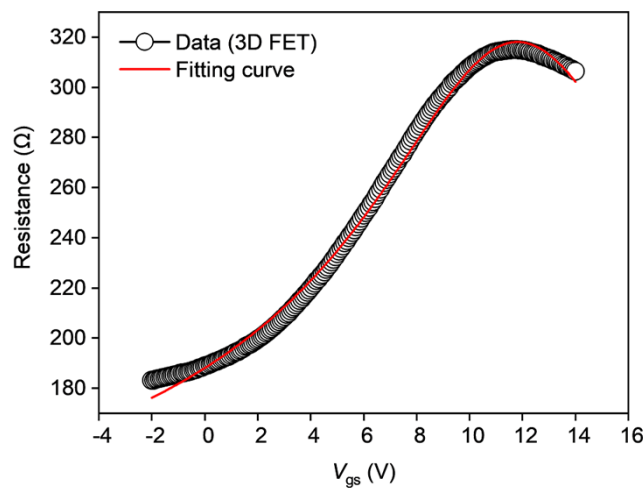

**Figure S4. The resistive behavior of the 3D heterojunction photodetector used for photoresponse measurement.**

## 5. The photoresponse of the 2D and 3D heterojunction photodetectors.

Figure S5 depicts the photoresponse of the heterojunction photodetector before (2D FET) and after (3D FET) self-rolled-up process. Under the illumination of 590 nm with the power density of  $0.76 \text{ mW/cm}^2$  at  $V_{gs} = 0 \text{ V}$  and  $V_{ds} = 0.1 \text{ V}$ , the photoresponsivity ( $R_{ph}$ ) of 2D FET is  $113 \text{ A/W}$ . After etching, the 3D FET achieved a  $R_{ph}$  as high as  $549 \text{ A/W}$ , which is about 5 times higher than that of the 2D FET. This can be contributed to that the 3D natural resonant microcavity enhanced the electric field and increased light-heterojunction interaction area, thus resulting in a high  $R_{ph}$  [2].

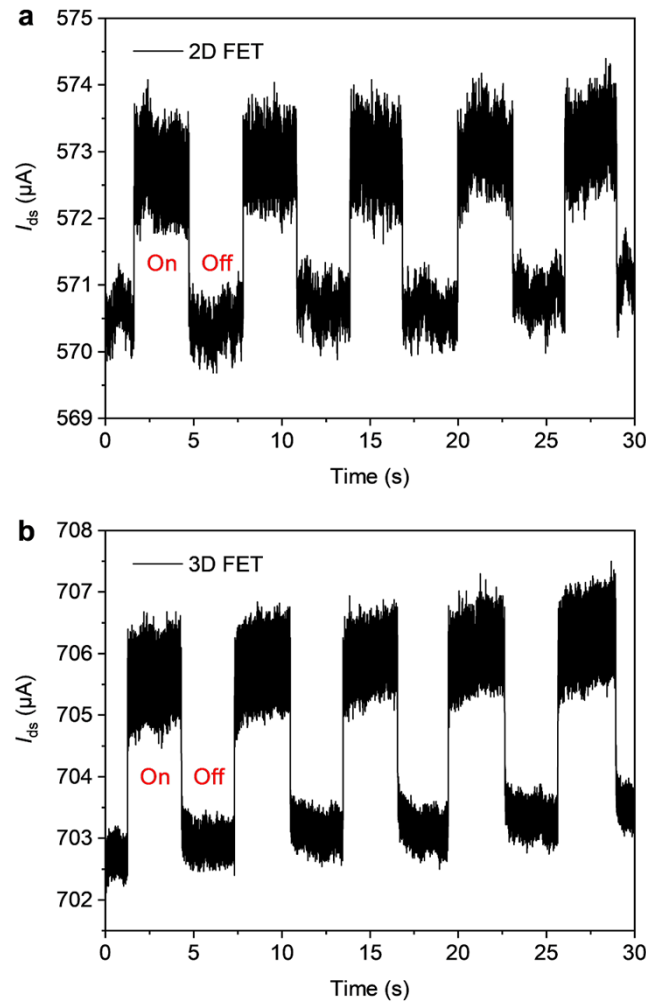

**Figure S5.** The  $R_{ph}$  of the 2D and 3D heterojunction photodetectors. The  $R_{ph}$  of the heterojunction photodetectors (a) before (2D FET) and (b) after (3D FET) self-rolled-up process.



The illuminated wavelength is 590 nm with the power density of 0.76 mW/cm<sup>2</sup> at  $V_{gs} = 0$  V and  $V_{ds} = 0.1$  V.

## 6. The photoresponse of the 3D heterojunction photodetector at 940 nm

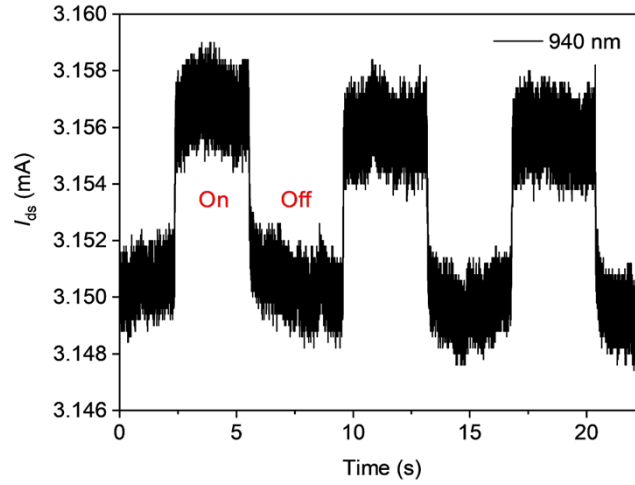

**Figure S6.** The photoresponse of the 3D heterojunction photodetector. The wavelength of the incident light is 940 nm with the power of 0.3 nW at  $V_{gs} = 0$  V and  $V_{ds} = 0.5$  V. The photoresponsivity can be calculated as  $1.9 \times 10^4$  A/W.

## 7. The photoresponse of the 3D heterojunction photodetector at 10.6 $\mu\text{m}$

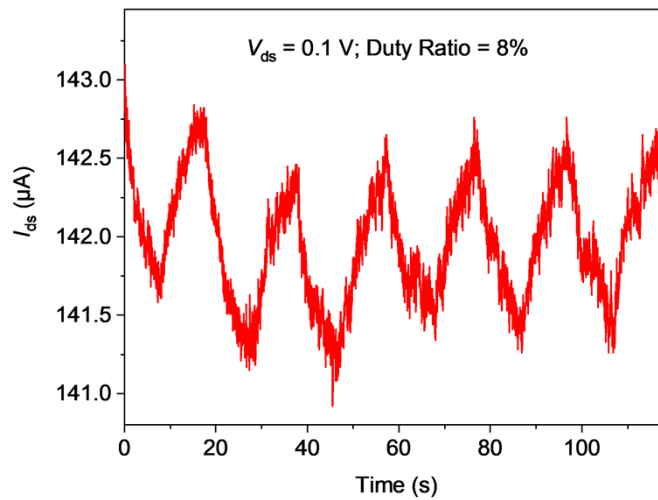

**Figure S7.** The on-off photocurrent characteristic of the 3D SWCNTs/graphene heterojunction photodetector at 10.6  $\mu\text{m}$  with a duty ratio of 8% when  $V_{ds} = 0.1$  V and  $V_{gs} = 0$  V.

## 8. The optical scanning system

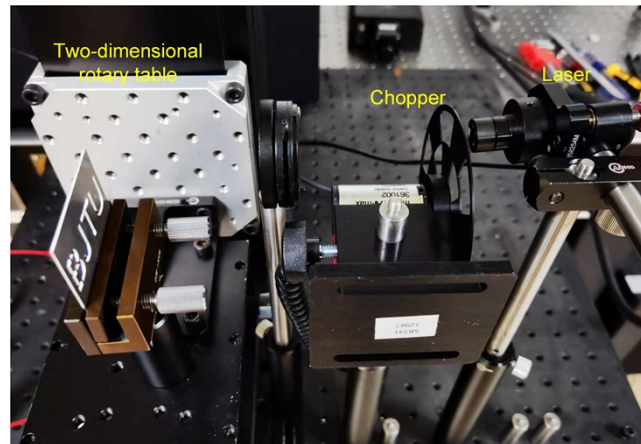

Figure S7. The Optical scanning system for imaging.

## References

- [1] Kim S, Nah J, Jo I, Shahrjerdi D, Colombo L, Yao Z, Tutuc E and Banerjee S K  
2009 Realization of a high mobility dual-gated graphene field-effect transistor with  $\text{Al}_2\text{O}_3$  dielectric *Appl. Phys. Lett.* 94 062107.
- [2] Three-Dimensional Graphene Field-Effect Transistors as High- Performance Photodetectors
